# Supplementary material
Source: PubMed Central journal article supplement (PMC3166883)
Supplement: NIHMS306770-supplement-1.pdf [file NIHMS306770-supplement-1.pdf]

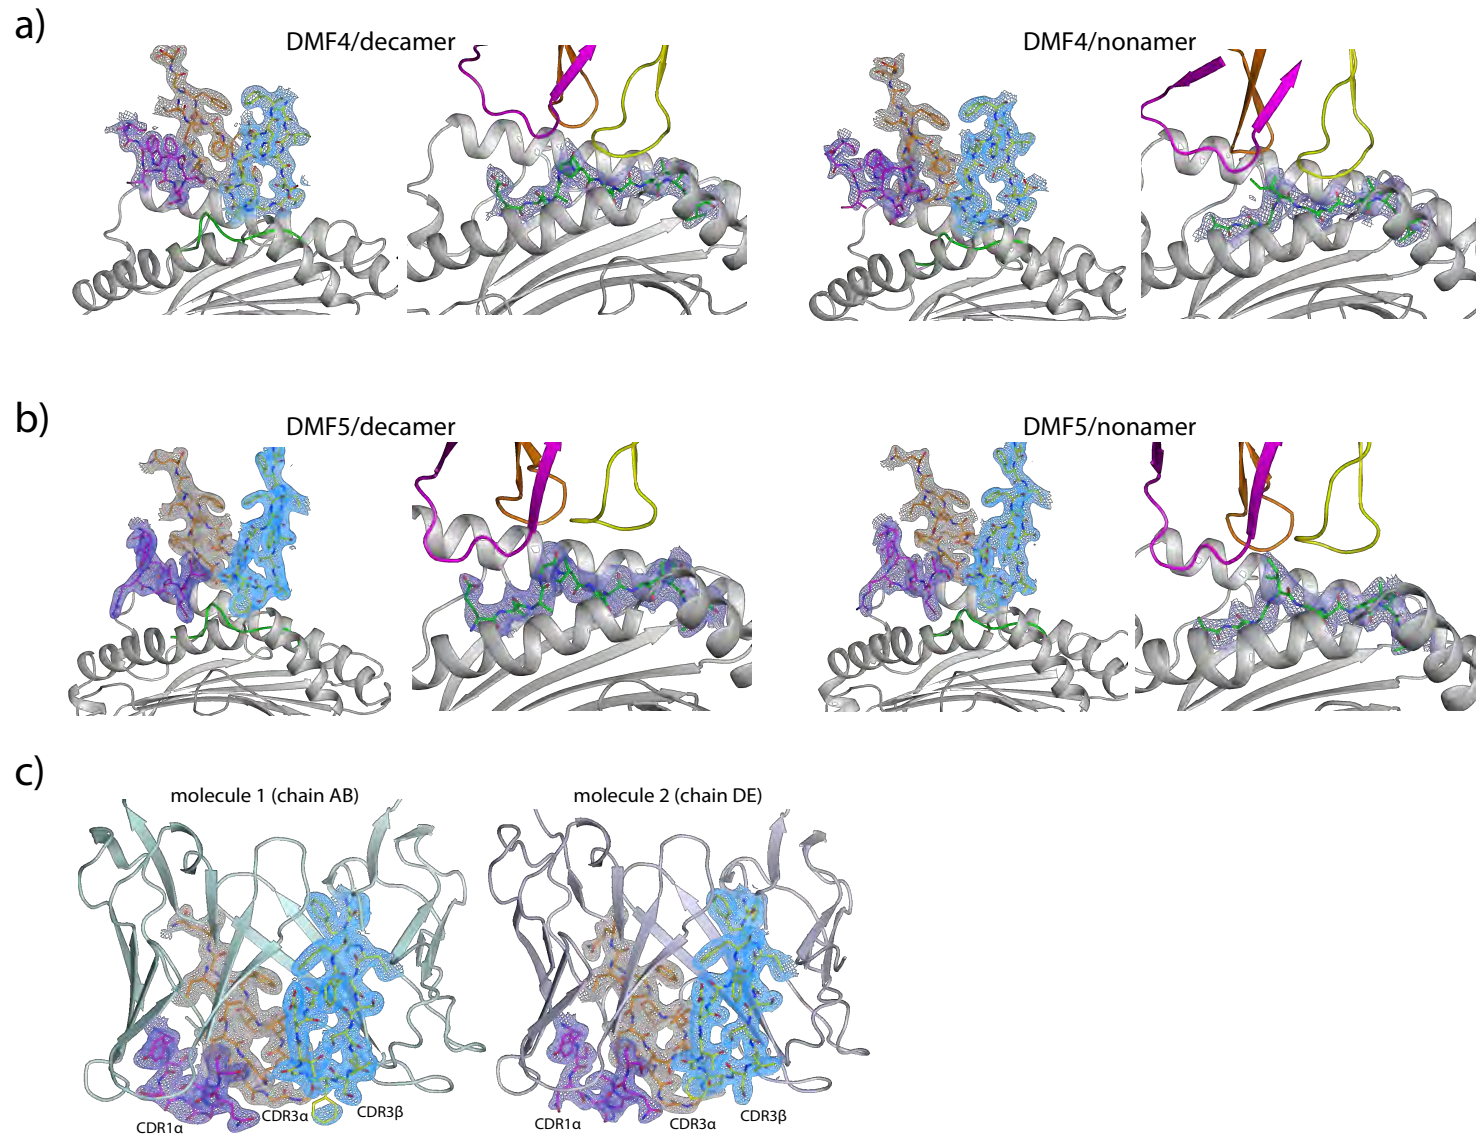

**Supplemental Fig. 1.**  $2F_o - F_c$  electron density contoured at  $1\sigma$  for the DMF4 (A) and DMF5 (B) TCR-peptide/HLA-A2 ternary complexes and the free DMF5 TCR (C). For the ternary complexes, density for the CDR1 $\alpha$ , CDR3 $\alpha$ , and CDR3 $\beta$  loops and the peptides are shown. CDR1 $\alpha$  loops are magenta with dark blue mesh, CDR3 $\alpha$  loops are orange with grey mesh, and CDR3 $\beta$  loops are yellow with light blue mesh.

## a) contacts in DMF4 structures

### α chain

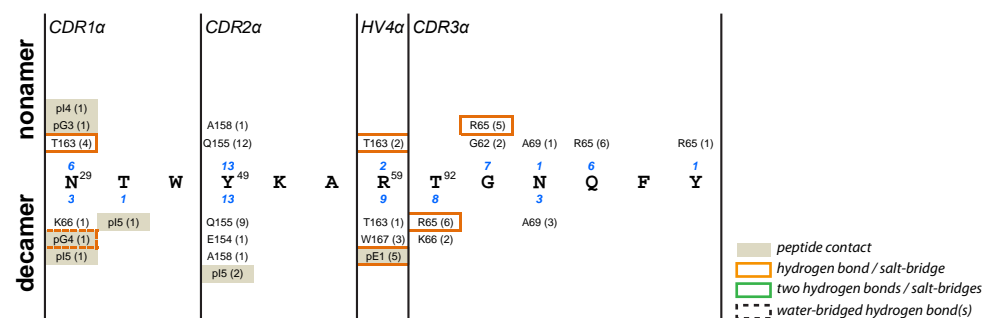

### β chain

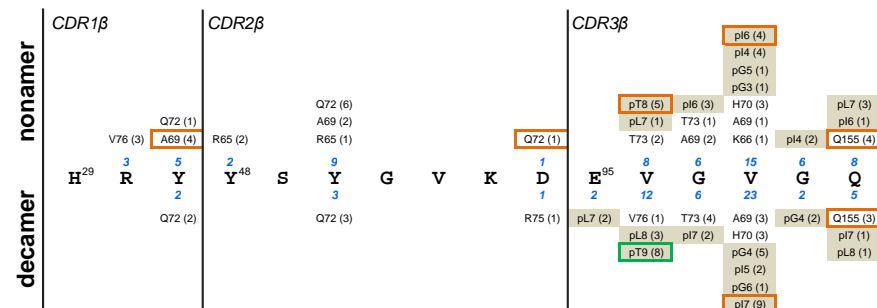

## b) contacts in DMF5 structures

### α chain

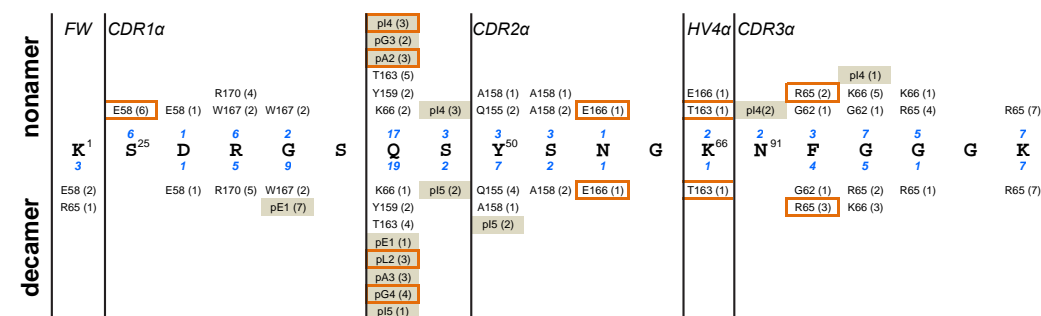

### β chain

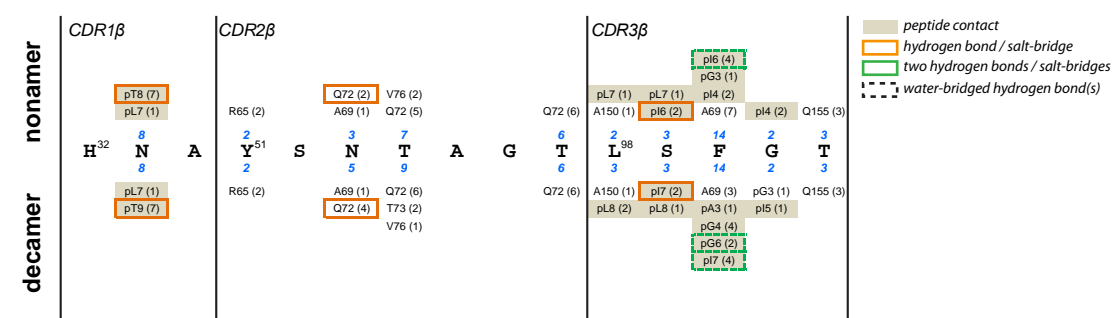

**Supplemental Fig. 2.** Intermolecular contacts in the two DMF4-peptide/HLA-A2 interfaces (A) and the two DMF5-peptide/HLA-A2 interfaces (B). For both panels, TCR CDR loop sequences are shown across the center rows, with the α chain in the top panel and the β chain in the bottom. The number of contacts to each TCR amino acid is in blue, with nonamer contacts above the sequence and decamer contacts below. HLA-A2 or peptide amino acids forming contacts are also shown, with the number of contacts given in parentheses. Superscripts on the first number of each loop give the amino acid numbers. Peptide residues are shaded grey. Orange outlines indicate a residue is involved in a single hydrogen bond or salt-bridge, green outlines indicate two or more hydrogen bonds or salt-bridges. Dashed outlines indicate one or more water-mediated hydrogen bond. Contacts were tabulated with a distance cutoff of  $\leq 4 \text{ \AA}$ .

a) CDR1 $\alpha$  - peptide

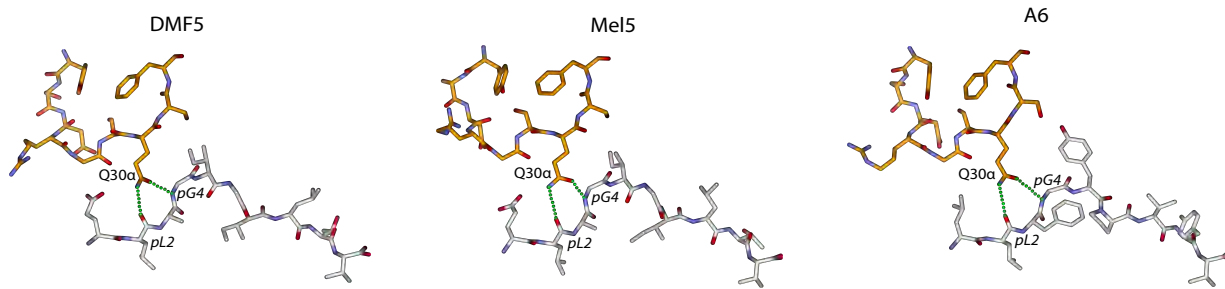

b) CDR1 $\alpha$  -  $\alpha$ 2 helix

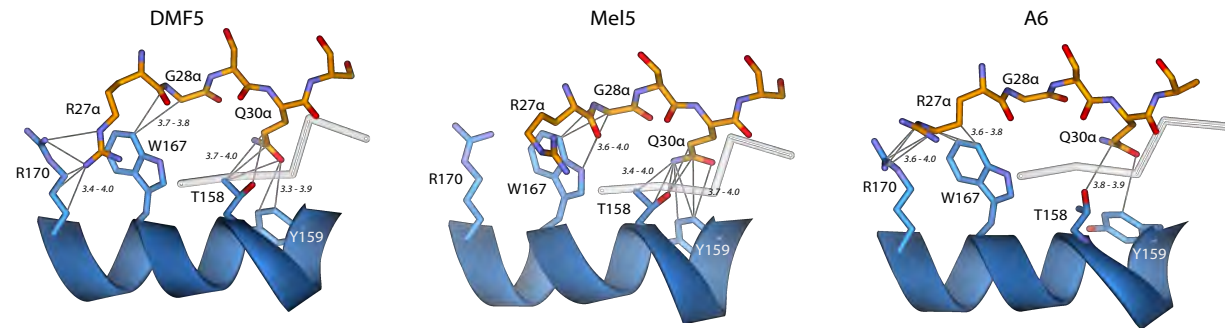

CDR2 $\alpha$  -  $\alpha$ 2 helix

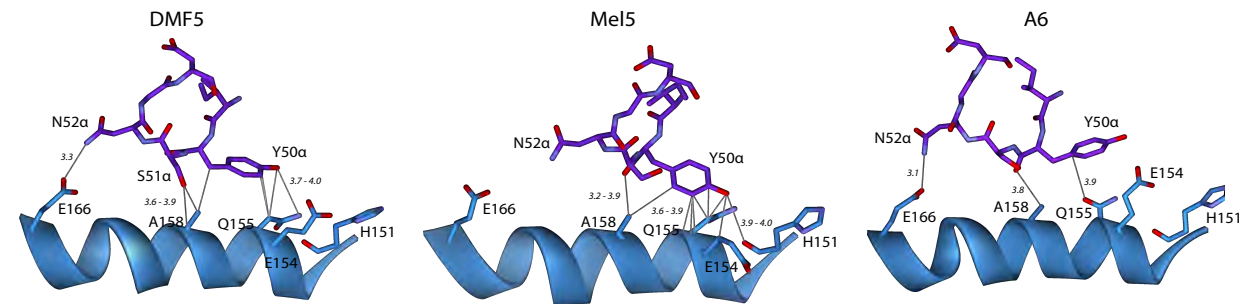

**Supplemental Fig. 3.** Interactions made by the Va 12-2 CDR1 $\alpha$ /CDR2 $\beta$  loops in the ternary complexes DMF5, Mel5, and A6 form with peptide/HLA-A2. A) The backbone conformation of CDR1 $\alpha$  in the DMF5, Mel5, and A6 ternary structures is the same, and in all three structures Gln30 $\alpha$  engages the N-terminal portions of the peptides identically. Dotted green lines illustrate hydrogen bonds made by Gln30 of CDR1 $\alpha$  to the peptide backbone. B) Patterns of van der Waals contacts between residues of CDR1 $\alpha$  of DMF5 and HLA-A2 (top panel) and CDR2 $\alpha$  of DMF5 and HLA-A2 (bottom panel) in the DMF5, Mel5, and A6 ternary complexes.

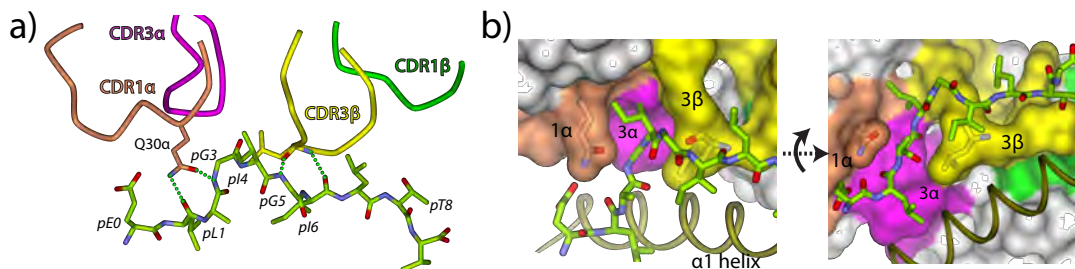

**Supplemental Fig. 4.** The Mel5 TCR accommodates the bulge in the MART-1 decamer via a slot formed by CDR1 $\alpha$ , CDR3 $\alpha$ , and CDR3 $\beta$ , analogous to the mechanism used by DMF5.
